# Supplementary material
Source: Springer Nature journal article supplement (https://springermedizin.de/resource/supplementary/13618_2011_32_MOESM2_ESM.pdf/9681018)

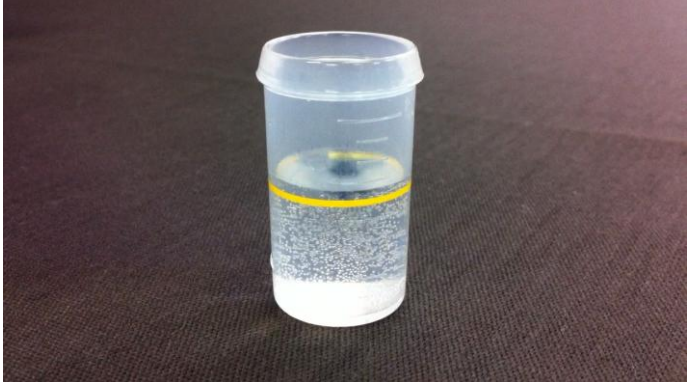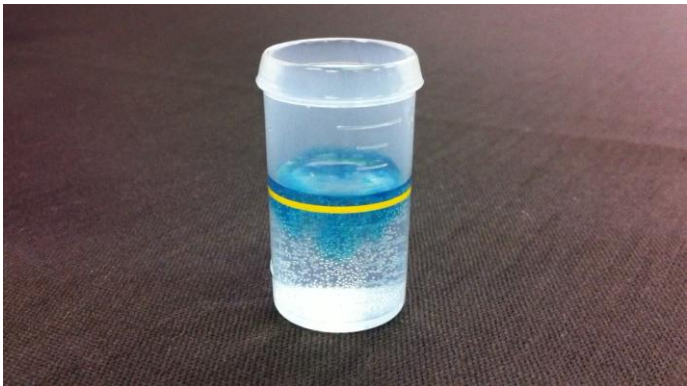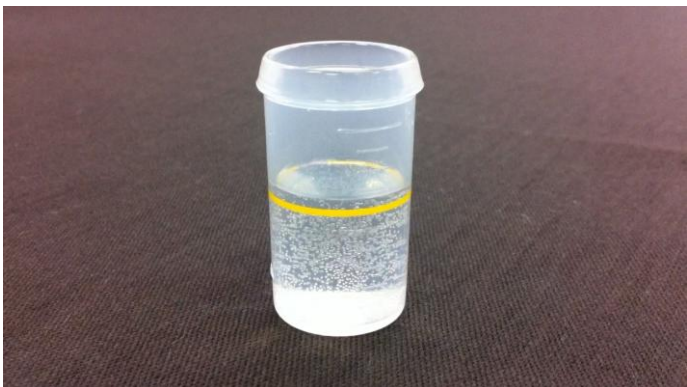

Supplement: MOESM2 [file 9681018]
